# Supplementary material
Source: PubMed Central journal article supplement (PMC4955763)
Supplement: NIHMS791532-supplement-1.pdf [file NIHMS791532-supplement-1.pdf]

## Supplemental Figure 1

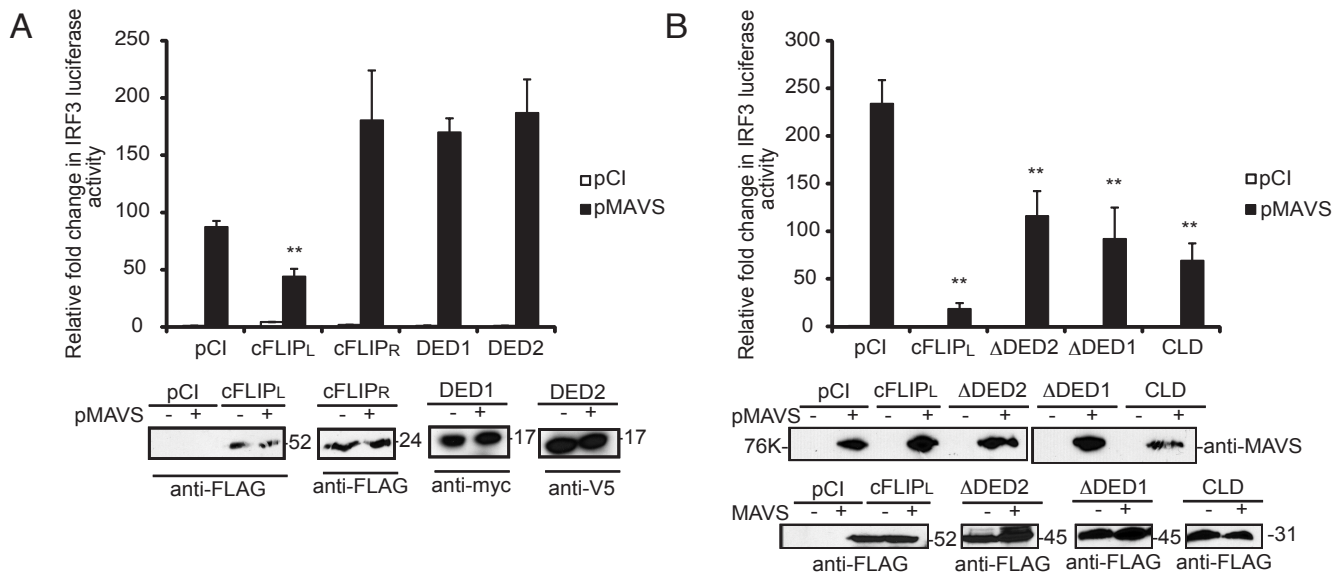

### Supplemental Figure 1. The CLD of cFLIP<sub>L</sub> inhibits MAVS-induced IRF3 activation.

Luciferase reporter assays in 293T cells transiently co-transfected with combinations of plasmids containing wild-type or mutant cFLIP-based constructs (A) (ΔDED1, ΔDED2, or CLD) or (B) (cFLIP<sub>L</sub>, cFLIP<sub>R</sub>, DED1, or DED2) and empty vector (pCI) or pMAVS for 24 h. \*  $P < 0.05$ , compared with cells transfected with empty vector (Student's *t*-test). Immunoblot analysis of cellular lysates for cFLIP protein expression also was performed.

## Supplemental Figure 2

**A**

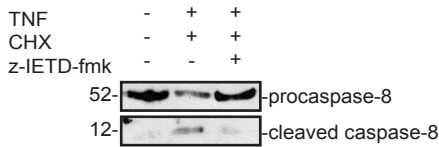

**B**

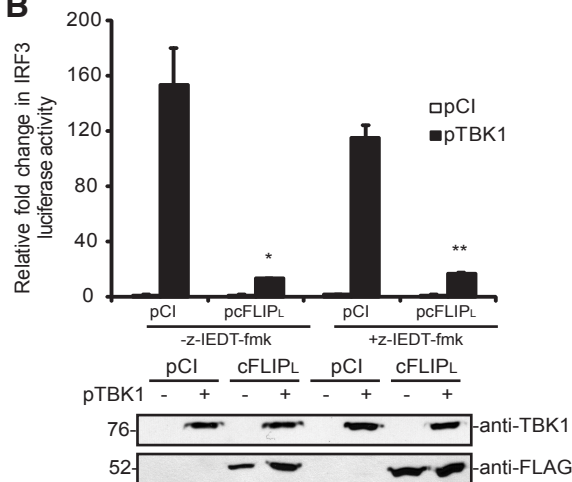

**C**

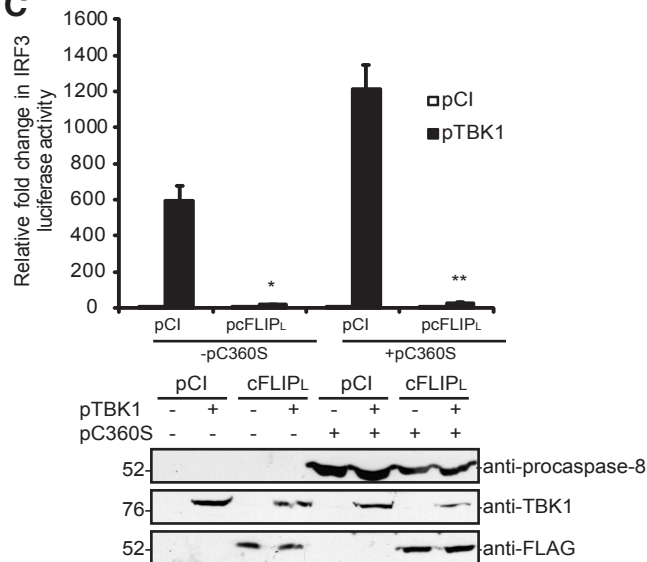

## Supplemental Figure 2. cFLIP<sub>L</sub> inhibits IRF3 activation independent of apoptosis.

(A) An immunoblot analysis shows that the concentration of z-IETD-fmk (50  $\mu$ M) used for these experiments inhibits caspase-8 activation. (B) Inhibition of apoptosis, using z-IETD-fmk, still allows IRF3 activation. Results are presented as fold-induction of luciferase activity, presented relative to those of cells transfected with empty vector (pCI) and incubated in regular medium. \*  $P < 0.05$  and \*\*  $P < 0.005$ . Immunoblotting of cellular lysates shows cFLIP<sub>L</sub> and TBK1 protein expression. (C) Inhibition of apoptosis, using co-expression of a dominant negative procaspase-8 protein (pC360S), still allows IRF3 activation. Results are presented as fold-induction of luciferase activity, presented relative to those of cells transfected with empty vector (pCI). \*  $P < 0.05$  and \*\*  $P < 0.005$ , compared with cells transfected with empty vector. Immunoblotting of lysates show procaspase-8, cFLIP<sub>L</sub> and TBK1 protein expression.
